# Supplementary material for: A bistable prokaryotic differentiation system underlying development of conjugative transfer competence
Source: PLoS Genet. 2022 Jun 28;18(6):e1010286. doi: 10.1371/journal.pgen.1010286 (PMC9286271; doi:10.1371/journal.pgen.1010286)
Supplement: S4 Data — Dependency of ICEclc promoters on ICE global regulators, RNA-seq and expression data. (XLSX) [file pgen.1010286.s012.xlsx]

## Sheet: Fig6a_ICE_Log2nrm_counts
ICE	index		2737_exp1	2737_exp2	2737_exp3	2737_exp4	2737_reg1	2737_reg2	2737_reg3	2737_reg4	2961_1E.c	2961_1R.c	2961_2E.c	2961_2R.c	2961_3E.c	2961_3R.c	2961_4E.c	2961_4R.c	4095_1E.c	4095_1R.c	4095_2E.c	4095_2R.c	4095_3E.c	4095_3R.c	4095_4E.c	4095_4R.c	4322_exp1	4322_exp2	4322_exp3	4322_exp4	4322_reg1	4322_reg2	4322_reg3	4322_reg4	5553_1E.c	5553_2E.c	5553_3E.c	5553_4E.c	5553_1R.c	5553_2R.c	5553_3R.c	5553_4R.c
PP_ICEint	5543		3.33122187741973	3.53529870711690	3.43239171613056	3.47089303788121	5.47742666966590	5.41411274416149	5.42929849501898	5.47931627200784	3.22226861629475	5.79199944132306	3.18563626485222	5.57940377504561	2.98938941679426	5.79190439595632	3.15362403006248	5.70564337814710	3.66587852310766	5.31715831688058	3.50005877284217	5.44085111374444	3.39641828412363	5.65537019528483	3.57227258269828	5.37111692978199	4.53376382281192	4.92804908937728	4.87411380989661	5.25974939827786	8.17835605976737	8.66787316560157	8.60172204853507	8.46182244296668	2.93548474925639	3.13684077794631	3.06080333388630	2.86956240529962	4.02544320750181	3.90844743467600	4.14624656185631	4.18409522498374
PP_ICE2848	5455		3.98775237819352	4.12230861462847	4.11420747687000	4.04732119718040	4.16060240216166	3.95829433608569	4.10584470380394	4.15388291117969	4.34288121625429	4.13887877902489	4.26796115703642	3.72815050100481	4.49177169173421	4.38663584181550	4.17616397490311	3.88257389411738	4.27588091163039	3.89765316731962	4.34621105126148	4.13533111231452	4.36970977135075	4.24286262189733	4.19651809396919	3.86416531533934	4.24173831127153	4.01405836286092	4.63177444429669	4.81072936392883	4.47434176882369	5.24863769548887	4.86513676510301	5.00261814359581	4.47352444903300	4.36056964070486	4.23366849289866	4.29419908303346	2.96191908303381	3.90844743467600	3.51853354917295	4.13087408928466
PP_ICE4438	5470		4.18561628800177	4.05942959493154	3.99351956599161	3.99043974303431	3.70635214708682	3.82412759210808	3.73009735608603	3.59492240466075	4.42925134065791	3.37738399099817	4.85918167660938	3.72815050100481	4.47457643466317	3.54325931289889	4.61032521248282	3.53468781775228	4.24905171733647	3.54963612320016	4.53921854651789	3.68779171759359	4.74804987068926	3.25609208193421	4.34042637631937	3.80485111124864	3.70845669698129	4.48262510880150	4.61642239408075	4.63406853906910	3.49053535226381	3.97708886104567	3.47188118095978	4.45418780938793	4.84464682935799	4.66466802524525	4.47651082072056	4.64105804907554	4.22286216566411	3.90844743467600	3.91406855893748	4.32861890360222
PP_ICE5512	5481		4.47334197750232	4.46840671789505	4.55160739446835	4.60125700114955	3.79473790313505	3.95041614976839	3.82571423905502	3.71397559703281	5.51824612969671	3.37738399099817	5.69926871953609	3.94647500903508	5.47921713066386	3.84567264085817	5.36871763902753	3.66456656492506	5.65503404674003	3.01134270945406	5.56994887972127	2.58791869348571	5.78333066064090	3.79905336014047	5.47830927820819	3.52456247703547	4.39383222473005	5.52462394687484	5.94942803540155	6.29248304767142	4.21210147234272	4.69821175381131	4.20907353958167	4.41026453267216	5.46782735309372	5.31391514806201	5.31350068194554	5.48680856352576	1.96173858365229	3.51296812184887	4.03688080767513	3.64857129350040
PP_ICE5994	5489		6.53543849547457	6.52169415437734	6.43066048838191	6.48535947167427	5.69341931052468	5.89677753551784	5.66449984357068	5.61583072540383	7.73465246481057	5.50271671810810	8.08980848934062	5.26713597152838	7.67031475914499	5.77309404642130	7.82197228168208	5.53342812987421	7.72785024208364	5.29318043319358	7.75485561994920	5.34775004300669	7.84846104959557	5.40919856077341	7.74161811566403	5.39631850761496	6.33630006347294	7.56445484511074	7.32555677141533	7.66464097409255	5.52004223256850	5.03732000729896	5.39080894419970	5.64128363843402	7.84885774339728	7.73356095210622	7.57007967427620	7.75103891091366	5.59810318705680	5.48495974916614	5.19872942763842	5.46266078226537
PP_ICE8052	5513		8.85429516858422	8.85384859334572	8.84224205921463	8.82118962780370	8.64280492557957	8.73231771742246	8.63317847021569	8.64535840418679	8.90575147342543	6.04088829488063	8.96488669685637	5.86133610131392	8.82271243327427	5.92272126971873	8.97115172603411	5.93966361908595	8.99283460418080	7.56530196454733	8.97646159870295	7.71055162626969	8.91285844474471	7.61686331319615	8.97467219214075	7.66179077575940	8.65747360346541	8.85982406588127	8.62347015363933	8.55056956173202	7.94139279176917	7.36766272077483	7.42759143328566	7.68757680709677	9.08488387755802	9.06967288199346	8.94561770351771	9.09235869584788	6.10290010667741	6.36082147234632	6.35807554886404	6.42442281694141
PP_ICEclcE	5540		10.8185824940722	10.7663157224540	10.7756288017603	10.7548254416653	10.5818633163039	10.6091660243652	10.5073742332378	10.5299704306969	10.9321911596550	7.96529389263139	10.8636560803970	7.79440095132167	10.7961044110656	7.79099364920157	10.8751003136403	7.80698085712422	10.9500218285907	9.40924213531182	10.9665191877675	9.49625404080281	10.8740571057963	9.46055031957466	10.9253993729891	9.39554825253993	10.5901284407878	10.8180191898848	11.0739687909701	11.1953392181710	9.76541137648306	8.98823083327530	9.22924094638854	9.62238368435795	10.9324765917106	10.8717453424382	10.8765516230436	10.9267166693849	8.36579140022120	8.22027003265309	8.15781248714880	8.29527683260878
PP_ICEclcD	5539		10.1361122787547	10.1331989198160	10.1583035125157	10.1734940890097	10.0919543227354	10.0074846525760	9.97096688468260	9.97709938464688	10.0151937085166	6.74502587993377	9.85777957811504	6.40515597160327	9.86959967169677	6.74840394995889	9.91346546459520	6.63774179077512	9.97553002912482	8.55483851418437	9.98996211757228	8.65341110973721	9.88911399709885	8.56091044794759	10.0347099372716	8.63210122764384	9.94115646738239	10.1775070057913	10.1885787989148	9.76987028754688	9.20733115151586	8.49510202736842	8.59452909989675	9.03772859081940	10.0504720077707	9.99559109664390	9.91577230331490	10.0387747295943	7.11927916357813	7.26759418135004	7.16551619658804	7.14934448550562
PP_ICE10938	5443		11.2986403442638	11.2107007029417	11.2001225846007	11.1039908426261	10.9743986029538	11.1191291664397	10.9320820635031	10.9404737514783	11.2667479482137	8.13195087210370	11.0930347727631	7.90326912435355	11.1969450223183	7.94400281098723	11.3099277550422	7.96640293935569	11.2265842651161	10.0670004753549	11.1444294184657	9.99810549564278	11.0336768225912	9.94177282712746	11.1369085428970	9.89814146569941	11.1273413415683	11.0978825314850	11.9466327609250	12.5543489133755	10.2261185660689	9.53506604727358	9.68066841689080	10.1906734290476	11.3284338024985	11.2293205165235	11.2854440961030	11.3020041924246	8.54973203159657	8.44050855176522	8.28283158373333	8.45652586410299
PP_ICEclcB	5538		10.7828802376106	10.8526913995397	10.8262799339675	10.7879083808222	10.7322068353443	10.7552365716051	10.7881717169256	10.7523929346284	10.6506372959141	7.58383234124549	10.4574514428680	7.39018667247517	10.5190391381386	7.50513054103871	10.7510521305249	7.48399393214543	10.7172731546738	9.38297714243101	10.6926484247270	9.43773080784724	10.5266403062798	9.31551704967438	10.6296136979063	9.29282910647007	10.6088736719423	10.7850705685900	11.1764296395494	11.2167288524030	9.98278442083297	9.39197632242629	9.49072854605137	9.83577560874074	10.7824794041736	10.6716861620841	10.6224815902658	10.7055211467561	8.00494104453832	8.06030737722957	7.87832003627471	8.05872811851864
PP_ICEclcA	5537		11.1172223151177	11.1047843730265	11.1091846079599	11.1294716237246	11.1500600850358	11.0960790647598	11.0469809997293	11.0144060224174	11.1219449659970	7.82759194896137	10.9825395932549	7.67693076969008	10.9827769398224	7.66756692902779	11.1084097120783	7.64187492180046	11.1609509198608	9.64256777577096	11.1245830270971	9.70251118832670	11.0047146339848	9.65793446518500	11.1002639766507	9.62395285268078	10.8643663916129	11.1454119049897	10.6111488125911	10.5775113509803	10.2245468723004	9.51833415950333	9.69997284114319	10.1403520704153	11.1097303643839	10.9786475704026	10.9337055892873	11.0641040962399	8.22883360747053	8.29208795530094	8.15311237112282	8.27207580905516
PP_ICEclcR	5541		4.87370885162548	4.83331031937204	4.79665668518527	4.74660180728252	4.80911326502798	4.97839540127990	4.79701637001861	4.87222436127730	4.61929054883507	3.90945007855752	4.64117525777700	3.94647500903508	4.50867626331010	3.84567264085817	4.53306430390243	3.66456656492506	4.63829658956279	5.07733355017106	4.56287171071524	4.41900582417992	4.66098429259412	4.52694662722932	4.56826358269319	4.57545146531208	5.11455430477523	4.66157250039788	6.00303587196976	6.21106031193159	4.94006209205066	4.98361333886535	4.41754811899025	4.95167848820532	4.51066692607068	4.68271337168786	4.61387189653556	4.68334419800666	4.22286216566411	4.05972661864310	3.91406855893748	4.32861890360222
PP_ICE15037	5444		2.08942667347998	2.63133896726748	2.39639655320537	2.50144293892038	2.69410544306696	2.58988979185201	2.48709414349643	2.35721304979809	1.54201042959543	3.37738399099817	2.03125132606501	2.41148644604578	2.25376622424385	3.84567264085817	2.13695499978307	2.82433115937595	2.09703115890318	3.94547669913568	1.94237962655033	4.10198104190121	2.36264388025676	3.64862772686237	1.55609185724113	4.28175955373354	2.48931371493898	2.55099172122124	2.26228975625777	2.13516461119860	3.65288847426069	4.44949724459487	4.50747032267284	3.96519938957505	1.55434628257174	2.40236022860415	2.23246630261722	1.86198531562350	3.77921738419741	3.98694497693341	3.69590238260109	3.81161298712216
PP_ICE15405	5445		4.20088640364422	4.24504998964470	4.07899353530864	3.85569012118387	3.93483573567631	3.89345936788396	3.89767042178321	4.01063133753715	3.49168195606717	3.18427058708844	3.37246812421069	2.78660165747877	3.38827182224364	3.70585440679003	3.02855556818559	2.49277313025118	3.35395152198571	4.47638138515429	3.27318036254136	4.53544949635861	3.56107029528490	4.80058640148935	3.36908544848311	4.48680461999107	3.98999107888039	3.73708243050057	4.45746214393283	5.10646444474047	4.25404359607567	4.86668609554681	3.94537147903320	3.96519938957505	3.34525971439038	3.38782971322633	3.30892237449019	3.09586814540181	3.23658694489144	3.51296812184887	3.02727710919988	4.18409522498374
PP_ICE15675	5446		4.52579513853170	4.47760294224401	4.39282081059656	4.27461837344630	4.60570653611206	4.88969356143977	4.59608764823072	4.73279741371080	4.38445651577092	3.61120416781174	4.63315647011161	4.12557091999083	4.42843378868887	4.12799738315156	4.15787549736310	4.14017350088111	4.24223042073542	4.71902806386388	4.49850918638769	4.71598244010344	4.43514761531876	4.88262513255711	4.35253754200344	4.70769432221945	4.62086944053630	4.70528923983998	5.24866093923194	5.54936033870527	5.79212518761971	6.41214425393118	5.90690762512102	5.79866824094074	4.29253738771048	4.32540555672106	4.22016961617335	4.30720728314968	4.59296489551557	4.05972661864310	4.41687849040906	4.75927231965039
PP_ICE16045	5447		6.15984754251670	6.15321799105266	6.26796708763537	6.16599160247217	6.27546962311956	6.35380817156065	6.30095058697166	6.34454213828547	6.08640239736681	6.71740734015882	6.20597417469167	6.56026853982546	6.00452672211566	6.61452860160400	6.11753005714723	6.66437556404939	6.01730887863630	5.75977687900673	6.08038866105293	5.75162760958329	5.94126461574523	5.76546124911338	6.02658712021538	6.00941913487840	6.22459183027352	6.52592238268745	5.08851723135999	4.41935645311233	6.92345234714607	7.14658206783683	7.18469283318439	7.28403323372949	6.06900973170378	6.12062184485303	6.02898192485281	6.13932902770168	6.89880762093784	6.65682444928876	6.86022984325859	6.67660230086367
PP_ICEtciR	5548		3.67467434280403	3.51153015453793	3.60274052205205	3.56475216323523	3.71656750819694	3.75925005178652	4.00022667111749	3.96466852125527	3.37304345644430	4.25488905376300	3.57722151631760	4.81060816919739	3.60877011142914	4.56051763418290	3.64722328403198	4.53182601705992	4.10291354954214	5.55811508960084	4.17799301691165	5.24508293892278	4.14296081901243	5.30123057259265	4.01157438070632	5.46832284665737	6.09550227227479	6.26641770497749	7.09222361542817	7.26232126096461	6.87086182443351	7.14974915034411	6.94158557748455	6.84145428555517	5.93361438004072	5.98825284025877	6.00304050524317	5.79929961329940	7.37534890025897	7.39033435883549	7.41299756372538	7.39870133914592
PP_ICEmfsR	5544		5.56689987025495	5.61663518278657	5.72243680151489	5.79595961085956	6.06140712063388	5.75635469695287	6.05908379188371	6.08624166196393	4.85487429804405	4.73774242509684	4.61282359041462	5.12683863817366	4.87971192854447	4.92993443798872	4.64493842391199	4.46116384728158	6.14252657042973	7.33096731208311	6.06662710629796	7.18490997305603	6.21911043064277	7.49516988083863	5.98039693983334	7.51008305352679	6.94127438962399	6.67274583742245	7.53361989873762	7.30833363246538	6.76993990088888	6.82365552581030	6.79572971939928	6.65062398102905	6.66743633401102	6.67771577136250	6.43512866451875	6.78404089491334	7.07373939607712	7.10453025979702	7.16044397627093	7.08876894865573
PP_ICE19619	5448		4.30170757929091	4.32280269014317	4.75846520038263	4.56390272204461	4.66648038652905	4.68069769548587	4.80327362378734	4.59606548482746	4.09753713181112	4.09701199908659	4.22651440999855	4.12557091999083	4.21458722502169	3.84567264085817	4.25734806617347	4.00531083262909	4.84929832724467	4.50347289319566	4.78548708567378	4.61973164904853	4.64056200992674	4.59221412411788	4.80858789653514	4.70769432221945	4.55335583624852	4.80688629038396	5.23208219460969	5.53964229974541	5.05704990558591	5.26958162636107	4.97871317150441	4.49626273296213	4.68581369896929	4.63884464690966	4.70158482549445	4.68334419800666	4.95278478119478	4.19109896528931	4.69157942586974	4.60168443825218
PP_ICE20709	5449		4.69651169813264	4.49274450862395	4.66037555708209	4.73169545377351	4.96647599895948	4.92313809601674	5.00074658888429	4.90686458077182	4.72607904171137	4.05331550889059	4.66485288603484	4.62991386888853	4.74097367801325	4.59193950894569	4.54566727369848	3.97600979669820	5.32890655612347	5.56738177757169	5.33343777215107	5.40464404154965	5.34430094681386	5.25888769360530	5.30382157662026	5.59842636897968	5.02425996846914	4.61585689068959	6.10930876460838	6.94717706032755	4.29429716220846	4.40129113182968	4.26540604971902	3.14287280858694	5.09964479510083	5.10286892547110	5.14796185729087	5.07077768818565	5.39825546053585	4.54938914908827	4.77782616160250	4.66772818900397
PP_ICE21241	5450		5.30129542020632	5.02882752415910	5.08539648664161	5.11977018499364	5.36082059488048	5.36728187034090	5.21430588042525	5.33833254908527	5.63994398147486	4.56612632647797	5.77659773503997	4.89002430323566	5.65574575621572	5.07354233096279	5.57203696933257	4.46116384728158	5.68942982347703	4.78166045815228	5.71784313628138	4.78682389844355	5.90405747980912	4.88262513255711	5.71689943778828	4.60333614445887	5.36058391100553	5.20530861086983	6.49648404294144	7.44800818852557	4.87600040082114	4.69821175381131	4.80311375368645	4.45418780938793	5.41389736349504	5.37122287954880	5.40067092331518	5.38806619083070	4.90865404484522	4.81262207865210	5.14295857818909	5.18118392581011
PP_ICE21922	5451		4.74163675145663	4.60626966932271	4.29049235503645	4.39273753502449	4.84591993148106	5.00629639492307	4.97743732616907	4.82218944559734	4.50875112862672	4.17906294159151	4.95699469837600	4.46911503552860	4.76978769749732	4.45985466754661	4.73868644331741	4.25899074923429	4.82284178403372	4.15532425026272	4.85184087677739	4.41900582417992	4.84509724571295	4.32867608105888	4.88917658691117	4.51723511272869	4.90881062922372	4.90496258012106	6.34238810908251	6.88302122824877	4.75917034342215	4.69821175381131	4.58996943689180	4.09635743617056	4.55086677621784	4.71439642819355	4.68464694667452	4.76835061827821	4.86248551115003	4.54938914908827	4.29068992763393	4.32861890360222
PP_ICE22813	5452		4.54028993233315	4.75321828207935	4.71062259414653	4.58648230508028	5.15199932559091	5.02537400363543	5.21016191397338	5.28594845077065	4.12430359471984	5.02886104127206	4.01898980434958	5.52021143902502	4.27988882689945	5.38330181844184	4.31681145389208	5.45527910863370	4.16395449366017	5.14991939742993	4.08192554266191	4.61973164904853	4.05430631633062	4.91364450743298	4.13858917112236	5.05917067166469	4.82073912126022	4.19574155973204	5.14479659116031	5.42600368521359	5.01955432869340	5.18303793662274	4.95150537109673	5.69239950154489	4.05714816618852	4.06394165767045	4.17143473815958	4.05912110273270	5.64239385471652	5.27957360872043	5.67792025172692	5.40320257521632
PP_ICE23526	5453		2.74069282861144	2.70582921033702	2.70246334258234	2.86543266746933	2.92067522810128	2.67835584868198	2.60617580023209	2.45306008196811	2.98457563900345	5.51314556203353	3.03835393161346	5.56005970243941	2.72833403633025	5.69410114659769	3.18666179801779	5.72651759342637	2.92406650007114	5.38582402304449	3.24447479375768	5.44085111374444	3.32213310111209	5.24801577623879	2.64552975641765	5.42090054727905	2.94723694338670	3.23583558088523	4.13995438218837	4.94324249841577	3.05581998572694	3.89860661148093	2.54152091848062	3.14287280858694	2.74169789587652	2.89072611875532	2.56662998475135	2.88753976782897	5.85611949011717	5.86046625303878	6.01661198214645	5.80203993789847
PP_ICEamnB	5533		4.37647884481783	4.42111257653884	4.23948375320827	4.29141944243813	4.19267850659934	4.23128607426614	4.21268875066512	4.27424303039853	4.63921552261164	5.77617492095908	4.83315680477730	5.95770063870142	4.73831258049006	5.76355449995567	4.84006637788432	5.93548180343349	4.70078895649790	6.72326774668699	4.63064891480505	6.58585577996167	4.48457965812634	6.87280511401525	4.47689388403167	6.65294644623899	4.47677163616666	5.15202637545919	5.18063014670072	5.43688492148131	4.94006209205066	4.98361333886535	4.36936096172526	4.15600315828517	4.86083304404437	4.95635965636573	4.79377434717690	4.68038234750209	6.10290010667741	6.09686530000128	6.21174562114934	6.25011561787672
PP_ICEamnA	5532		3.81781396175871	3.95186379270036	4.08918182783239	3.95841609039418	3.77576067693384	3.70008069608923	3.80053035146022	3.77265631861518	4.56978563065813	4.51115047948973	4.60870692840313	4.89002430323566	4.49856785039486	4.81305436667243	4.44472315657430	5.01054803584516	4.37653131112567	5.35208042661268	4.35584143374584	5.31804127691958	4.40948400964532	5.46351989419974	4.27756749537940	5.20490774915494	4.01688993129444	4.55973851314997	4.22355688012724	4.22135817896477	3.79252784559341	4.35064297132312	4.46351963081565	3.14287280858694	4.57252093215250	4.42739244674073	4.42802632844970	4.54393428489693	4.65299388110597	4.54938914908827	4.97696581828364	5.05931455424588
PP_ICEamnC	5534		4.36796692303962	4.49574550298396	4.35079869510810	4.36526387595024	4.50469602352810	4.46461043820102	4.33942029618951	4.47058010237936	4.91653667306054	5.01187946813430	4.88767222549785	5.31817131449252	4.88892253466677	5.11105077261396	4.97377569260791	5.42082404995867	4.72219385918430	5.41846605869381	4.67340909627240	5.43192150418303	4.57666676660366	5.53164234313240	4.55851401326152	5.50246972010585	4.51780906263939	4.50899584582330	4.20037504707079	3.34454267865749	4.47434176882369	5.32990351041739	5.10464514673363	5.14150313689054	4.99017649132566	4.93157095750930	5.02518289947442	4.96276529656035	5.64239385471652	5.50169772005748	5.46675733208617	5.76005839614904
PP_ICE27249	5454		4.33317566042394	4.33343267709639	4.17648651185567	4.27122401899669	4.03578049747804	4.26071148464219	4.20136553004489	4.01702833663048	5.40749248669181	2.94471770235295	5.32747921908868	4.12557091999083	5.63748109552549	4.02442583510742	5.53702803665592	3.88257389411738	5.44022934081086	4.71902806386388	5.31890996206004	4.53544949635861	5.42750466553267	4.86674699498562	5.27552707008693	5.00545621173615	4.36614422159167	4.67635811728318	5.05416279895908	4.58455620735629	3.91503587204421	3.89860661148093	3.94537147903320	4.15600315828517	5.10469006708603	5.02470171970436	5.34267279162873	4.86165181343583	4.30865140992889	4.25083321149932	3.69590238260109	4.69918329466957
PP_ICEamnF	5536		4.58599755272633	4.54827810861381	4.63427239905662	4.76751838505512	4.56738647130849	4.56359718335688	4.56491184869495	4.69143289647938	4.97743393373051	3.53917244579729	4.78936632206150	4.04002703563060	4.79779466927944	3.23559179493522	4.91782366016341	4.03377770182316	4.83426611617832	4.11673056871732	4.79170450947826	4.16760475783358	4.67104113273540	4.14898805184514	4.57791901507795	3.74179565726024	4.78752493116164	4.82602330400124	4.51900470624129	4.53246412055838	4.53816767848952	3.72033088645135	3.58620729847388	3.63628422817904	4.85438996316867	4.65735771088757	4.68036726739234	4.73239810396018	3.77921738419741	3.73013216984948	4.09305804876628	4.07466045412385
PP_ICEamnD	5535		4.47718125514381	4.49274450862395	4.44386988910999	4.62301764038638	4.31717841402554	4.41615919445493	4.18413660440068	4.40356003846291	4.53536617939196	3.18427058708844	4.44308856196549	3.27246620990602	4.28409431245650	3.34899448211772	4.40707914258313	3.14370131753427	4.20740802469048	3.84742717009467	4.18937762560128	3.73783286796552	4.20862742496689	3.79905336014047	4.04487225457752	3.97318004217403	4.57257136693863	4.65409689513916	4.50180417098217	4.44885517766311	3.79252784559341	4.04985735685243	4.01809677936997	2.96914593806516	4.63480456629711	4.60849183678736	4.43900563326000	4.62864042723660	1.96173858365229	2.58062471418869	3.91406855893748	3.21134995476312
PP_ICE29347	5456		5.04176728437236	4.99848014362706	4.95993520390159	4.79809513027315	4.78496522150628	4.81592644667130	4.80949196767418	4.69143289647938	5.61942892841569	4.45297556482171	5.40853965682473	4.20437021886274	5.41088499420648	4.73575123092887	5.43089996175101	4.28114940989777	5.28645738932036	4.44853544106843	5.27401556691920	4.80377698451614	5.20193449316887	4.86674699498562	5.24147202595855	4.94869191336641	4.93828645453196	5.30795472619479	5.26496930552243	5.38125460548704	4.37024686549525	4.24093365854871	4.36936096172526	3.81420443436707	5.52562612167931	5.60984562278215	5.42540615376275	5.43935020251449	4.81408183447956	4.70816410262213	4.90685263248604	4.86959524800222
PP_ICE30304	5457		5.69834039421180	5.50841859906970	5.53102839297524	5.56185909679159	5.39933186776845	5.56343262115087	5.44419622441087	5.37834963639913	6.41155414757188	5.12510641425565	6.28309507838593	5.29297918346232	6.28556062355714	4.99402117101785	6.32713821385414	5.08191157709781	6.06708726581957	5.64713055973105	6.05267352550411	5.50122065647520	6.03505762829664	5.42763549094164	6.03780883330773	5.35827389891412	5.74640468877806	6.04075292631507	6.81945168770342	7.50706367641702	5.14506380936308	4.62197937163855	5.05615836113813	5.38910961438215	6.31746097235391	6.27821344416011	6.31717526452625	6.20859186160675	5.39825546053585	5.25862858944870	5.34950227077051	5.21871603407173
PP_ICE31453	5458		4.17530511034127	4.21376360435210	4.10427224412462	4.31772748029103	4.21761859901475	4.16333078481352	4.26211404080573	4.19740971038572	4.76857088062364	4.35882909447351	4.75432610965912	4.52563672165591	4.66077261629667	4.45985466754661	4.61032521248282	4.56536880410938	4.53656337573931	3.79454450008152	4.54716526055908	3.91617892672368	4.55442772739824	4.08112171538865	4.62484538804404	3.34811656399547	4.41187395860746	4.78737589443647	5.02888062255582	5.59658247134952	3.85565671390020	3.81343627836155	4.36936096172526	4.15600315828517	4.75597605112175	4.79747658841724	4.61387189653556	4.66242462168906	4.02544320750181	4.77900071266398	4.45563479358891	4.56695144417387
PP_ICE31950	5459		2.69620742784836	2.82416415723737	2.54934462338837	2.80836162929617	2.54180204095069	3.07024453451439	2.93758267323130	2.76464520914644	3.61983896411009	4.39120614312673	3.37246812421069	4.85110439442351	3.54932230295175	4.78794481933665	3.40478063662434	4.92222056673322	2.87156136565865	1.76278791344070	2.72073004130301	3.57950613373024	3.19920709552928	1.97920455672530	2.57686599516795	2.22297141208535	2.84555271444896	3.03011849559156	3.58912836827918	4.38896103551334	2.73800623060672	2.57134540208996	3.68879364955304	4.15600315828517	3.38817764651574	3.48718262771426	3.77365507425791	3.45632456374728	4.81408183447956	4.63192450715066	4.93077407977833	4.01509764246824
PP_ICE32963	5460		3.34320294941434	3.40145759624698	3.51670699750499	3.30673476067711	3.92663174907062	3.66912914872213	4.08046747469872	3.84337167534136	7.80030133296708	8.54234718555154	7.65061100061370	8.61020216969099	7.73811142260375	8.61838598472884	7.80848010407222	8.69953152340513	3.74769958920480	5.19106945599165	3.70343699460887	5.29773347949292	3.64824447854981	5.23702435991225	3.94145561964578	5.11014637441295	7.83039631356285	7.69167007692580	7.27267015697993	7.64580364051998	8.08218096577708	8.51062840815367	8.32998013262709	8.13383438472260	7.72810552540972	7.69754795328408	7.64493393736355	7.81099043729959	8.48370658840063	8.68962502545654	8.64248837100451	8.49482043275813
PP_ICE34495	5461		2.76221477898042	2.79175856088167	2.81730018745068	2.89279149352096	3.47649319701173	3.29173347834881	3.42285734905272	3.32912063673515	7.26697982158129	7.16014115964372	6.99409031899982	7.08054088581334	7.20932581855311	7.21482887934168	7.09979825007217	7.20300899429779	3.53599499568310	3.22459236949068	3.77446582097336	3.91617892672368	3.56107029528490	3.70132417641264	3.46126153096534	3.60233609719672	7.48921014794771	7.64678103801808	7.21625514184480	6.72606431528784	7.95162467334806	8.17569507384571	8.06070464263593	7.83534917727283	7.23056876948209	7.27318360323792	7.28795833254191	7.21603747599928	7.07890299993898	7.28168901453244	7.05601684358023	6.95210782286546
PP_ICE36077	5462		3.94300675540898	3.79575232713176	3.85624089161954	4.00828882496435	3.99045299944321	4.16970293519261	4.11208964695947	4.10837496996350	8.76109046242667	8.80817205585345	8.62956554688995	8.93238293086286	8.81139008605615	8.84984571495172	8.77517261390389	9.06239777761438	4.46797118953347	4.47638138515429	4.33648702192451	4.98753275718106	4.49656508618336	4.88262513255711	4.26450726985445	4.84627832366167	8.47771958178310	8.45928451140839	8.51432407531989	8.56252054931054	8.13693698594487	8.27488774023230	8.19956855905740	8.17421083019243	8.70419831100445	8.65566485248898	8.76432185284756	8.61792919355657	8.91036394696535	8.84238105461483	8.83617144265552	8.85052907501817
PP_ICE37143	5463		2.98975191970480	3.07645900957921	3.22694273251803	3.21330236884930	3.95104451232622	3.44712036528702	3.57233726676135	3.67882995426296	7.87642039268185	8.27476040501598	7.66624420995227	8.29666042308973	7.67371694988104	8.17763400207569	7.72050276812225	8.36807947714903	3.64121644078844	3.40026319402134	3.54417821854131	3.91617892672368	3.59098072249959	4.08112171538865	3.30254820966255	3.92015747007615	7.74706199988625	8.24085860401167	9.02985965661788	9.67062252812886	7.95568829123956	8.46415659059578	8.26388897374496	8.13708194697784	7.75512245699747	7.71735200048129	7.73256894095159	7.72214092322310	8.37428806574912	8.40199905914120	8.34227224924104	8.33278767010933
PP_ICE37489	5464		3.16080036580049	3.06399361612899	3.51670699750499	3.27040250253985	3.72667957005441	3.55843768243447	3.99323999113648	3.53479841190626	7.63917174239217	8.26487817759266	7.61594455080388	8.20390293152672	7.48093326562264	8.14628149476484	7.81183043559419	8.35138231226860	3.30274602724947	4.03476514882906	3.56552883323122	3.83097655377657	3.46556471295602	4.08112171538865	2.93205908932053	4.38952834095280	7.86352282568654	8.26932798002316	8.06984469762200	7.97412629847572	8.14870829819759	8.35947994805445	8.26489323548115	8.20497394855662	7.77969625566300	7.72010039354747	7.70607685066537	7.79636900932867	8.17523412555314	8.34565913225908	8.15781248714880	8.22854409779698
PP_ICE38184	5465		2.62553324746354	2.55085009208691	2.33973291150982	2.54058143128572	2.94295151415314	2.75962778864531	2.93758267323130	3.17881888619277	6.53561632129181	7.17206051768151	6.60937281503815	7.26698362808077	6.51331162673774	7.20126406391021	6.57602175452006	7.35384565183239	2.78724240461370	3.01134270945406	2.90027112551677	3.24275305059633	2.00318932302950	3.64862772686237	2.33704917165422	1.87023482899454	6.90314637468583	6.64648883828131	6.05391553961373	5.15065280472828	7.39911892325280	7.59220477898272	7.47070581953923	7.22122985306883	6.63092047655154	6.62117491681680	6.49766418340137	6.62214725540613	7.50784418850113	7.52410245126069	7.36650627907646	7.51826550085458
PP_ICE39860	5466		3.68318749704935	3.66714227890107	3.37195367819549	3.69991282370639	3.46348786830193	3.40707947823394	3.33203920660151	3.56531220205330	4.38953396623506	4.99460453223763	4.44308856196549	4.76840253150956	4.42843378868887	4.34791270554978	4.36796243812268	4.47930298364101	3.68994699737141	2.88481892590752	3.40551250300360	3.15928595097364	3.87174611039627	3.33316587055327	4.01157438070632	3.00639377543106	3.91205580336262	3.40636846165143	4.69092902887872	4.44885517766311	3.65288847426069	3.05112086293421	4.14937724481658	3.63628422817904	4.30381072834587	4.25662713149303	4.17854397201387	4.22181088361012	3.90988962335847	3.73013216984948	4.03688080767513	4.18409522498374
PP_ICE40922	5467		3.18898474769311	2.82416415723737	2.79905331907819	2.73211345965068	3.19479137759916	2.88192957089437	3.21701969690295	3.10223974025255	3.52829388415874	3.90945007855752	3.29881405410407	3.44844891678483	3.55803429613106	3.45083685137081	3.29438815513748	3.77949940134930	3.13122495037595	3.47773610355402	2.81452455817227	3.24275305059633	3.05902420792299	3.70132417641264	2.93205908932053	3.80485111124864	3.23146043623753	3.23583558088523	3.74857965746191	2.59754545755246	4.73407232458657	4.35064297132312	3.78182832005725	4.21229063387470	3.26936410120112	3.20181211631978	3.25688395745548	3.25593855871265	3.77921738419741	4.05972661864310	4.14624656185631	4.13087408928466
PP_ICE41973	5468		3.10193039985157	3.10093310513436	2.66105422674891	2.59655876778474	3.19479137759916	3.26069119554447	3.45938883195422	3.35417712165119	4.04175397878359	4.59252090030226	3.88377308649072	4.46911503552860	4.23242214774555	4.70859600074560	4.15170424901762	4.51462304614947	3.82332935548327	4.15532425026272	3.75717596968252	4.25861043878493	3.59098072249959	4.48094141447979	3.88543890241837	4.31898796083337	3.05700779213297	2.77082221299294	2.34058729269710	2.39284481291281	4.33299288529533	5.32990351041739	5.25792852313951	4.78115326481198	3.81483433676581	3.96636262158819	4.00912066600222	3.83061753009961	4.52910100015285	4.50541789202627	4.37655936342752	4.66772818900397
PP_ICE43387	5469		2.64965056908551	2.92996598267887	2.70246334258234	2.54058143128572	3.17751759604443	2.75962778864531	3.20166550666020	3.14888720969077	2.80410856092447	4.13887877902489	2.91164403300933	3.05875622493888	2.50660651208046	3.45083685137081	2.79364911058708	2.99671208168330	2.81614593084595	3.31628036158212	2.56114673931570	3.63511393106765	2.83507334929529	3.70132417641264	2.77015059922415	3.67449503077419	2.92771048640028	3.03011849559156	3.16488668998889	3.34454267865749	3.39826899012587	2.83973439329232	4.14937724481658	2.96914593806516	2.50110609277970	2.72790637145763	2.94616379537009	2.71276890815416	2.58198504943459	3.23517311366610	2.64574694897281	3.06389384461933
PP_ICE45180	5471		1.95569249609433	2.23283998532749	1.81531790524063	1.58835355616365	2.19064854336443	2.12787230565623	2.23695404123676	2.54051861587338	2.12201660692297	1.81553628414310	2.31327550015015	1.80422507340509	2.04083897283641	3.10766423129923	2.34567638711141	2.18883792254591	1.90413076835397	3.22459236949068	1.70137831872810	2.21935253917052	1.84749106855089	2.23173107417580	2.13777162415169	1.87023482899454	1.61993605592887	2.81898007181563	2.60390723309902	2.39284481291281	2.73800623060672	2.57134540208996	3.19449873442977	1.54651001445774	2.08558742501608	2.25162751202438	2.18159768758725	2.26534472687595	1.96173858365229	1.62303736425890	2.02114805484218	2.05458368133399
PP_ICE46315	5472		2.34568049452287	2.77515326512173	2.42356811754881	2.69990824501099	2.69410544306696	2.52624177602473	2.23695404123676	2.48307088803824	2.67216398883271	3.18427058708844	2.76651689224596	3.27246620990602	2.64544518600195	2.96093680658063	2.92855681667850	3.43766995663103	2.84423745794843	3.40026319402134	2.04410527468251	3.15928595097364	3.05902420792299	2.60075954016460	2.57686599516795	2.68951620586602	2.60466809880211	2.55099172122124	3.63143736774245	2.91251498484673	3.49053535226381	4.53945246803086	3.94537147903320	3.63628422817904	2.59823338274052	2.72790637145763	2.69943885978204	2.66940356972829	2.58198504943459	3.23517311366610	2.64574694897281	2.89087002495697
PP_ICE46777	5473		3.30682030077214	3.35567175225493	3.30762657671297	3.60526892652137	3.21177183526779	3.55843768243447	3.33203920660151	3.01930625704873	3.65211730091513	3.85649621087871	3.74709235051625	3.27246620990602	3.84942846687754	3.77820517827402	3.71652893950424	2.61591569982476	3.89363924453386	3.94547669913568	3.85669646967896	3.24275305059633	3.62002243675269	4.32867608105888	3.40076429624615	3.74179565726024	3.35454256608367	3.92480510263012	4.93217572550553	5.07588206383451	4.47434176882369	4.83518571595563	4.86513676510301	4.53663860432416	3.34525971439038	3.55571254509964	3.75218643644268	3.56155694226584	2.58198504943459	3.38368601795468	4.24482186481978	3.73341129066585
PP_ICE47630	5474		3.95599682031135	3.92571483909780	3.91825494554677	3.66312303158538	3.63176435434764	3.70008069608923	3.68341664886323	3.63308629749612	4.48140830303660	4.48248600260195	4.78245581697322	4.12557091999083	4.61058276910458	4.62240405421864	4.57447083764405	4.51462304614947	4.44588307903145	4.52984976933093	4.65225754226841	4.91502434291953	4.46016904648659	4.92880067536748	4.49793191339501	4.73216677487758	3.80318026860815	3.90912319420655	5.21522395502911	5.60576508438061	5.65017180337760	5.80296397429274	5.94846927098969	5.60115554965429	4.57252093215250	4.53662966279778	4.60927762456910	4.68629730185275	4.52910100015285	4.36055747234944	4.45563479358891	4.75927231965039
PP_ICE48922	5475		7.07786077031767	6.78216694910356	7.04040047310373	6.99334207551218	6.46933976246112	6.48810500076827	6.43215736975738	6.36790159932813	7.05224116355667	5.95797958541829	7.02989612855737	5.91753300176459	6.98512824553791	5.86379534285386	6.93194955536786	5.62894847248096	7.08641358802209	6.59981201530527	7.12417859929389	6.41001283641289	7.04746059526862	6.40685928654235	7.16996958774097	6.47934446395615	7.02561853469201	6.86197596961190	8.39143406351912	9.19634854350721	6.44317118660849	6.50670386607368	6.27542719416762	6.54487613631879	7.04393887169133	6.98734032752167	6.99807801873559	7.06490247894901	5.80221127450801	5.50169772005748	5.87081314428664	5.58477349378691
PP_ICE50240	5476		2.54948178438869	2.46331116945052	2.70246334258234	2.68340815679893	4.30596707191123	4.11755124062783	3.93551643511177	4.09076100759985	3.67307152071473	3.95974029378966	3.68672131849714	3.59804711912085	3.64916821389240	3.96831826209664	3.36479784949552	4.03377770182316	3.43386589322369	4.62890581496734	3.72167275131749	4.67858632471332	3.43158903309203	4.86674699498562	3.26754220474390	4.42301625444146	2.96638940892341	3.89319144027508	4.34225824317402	5.38125460548704	6.54791227909275	7.46222169936546	7.31739003099145	7.15421631967456	3.44267844908784	3.42625299649095	3.39005310982630	3.42559294456958	3.62886623696473	4.19109896528931	4.24482186481978	3.81161298712216
PP_ICE52324	5477		3.87539791332161	3.58865561416458	3.56064869549291	3.72370829970834	3.77576067693384	3.70008069608923	3.76593382649515	3.83575687444362	3.42751598871347	4.13887877902489	3.52982803923289	4.20437021886274	3.33550863408527	4.26565514124749	3.21864288907377	3.81505120855519	3.73641282120793	4.98264682759914	3.45390259663791	4.82044744812820	3.32213310111209	4.98722765130659	3.51830669820529	5.09344154238142	3.64314362707634	3.73708243050057	3.22885054655327	3.42861003091476	4.50676385558871	5.54028940903552	5.00520027286513	4.26557795111658	3.25346844183941	3.08518286053205	2.75976582255490	2.95638176726300	4.65299388110597	4.12756857906457	4.59718604446919	3.88414024753582
PP_ICE52710	5478		5.45809197164534	5.39805352446124	5.25221862715040	5.32910713947650	5.25095497309886	5.12057780975160	5.13022821909810	5.08838971524142	5.53931832059916	5.99710086556162	5.64807869611325	6.04558979861314	5.57368574307853	5.97836730622473	5.51510222027195	5.99249332045217	5.51579694470101	7.11468418834744	5.55561536792146	7.16766783482388	5.48232901964425	7.39179485559639	5.57501390063457	7.32757039838979	5.52464717074530	5.40458754906356	6.21479472158110	7.04283433844188	5.59799288130417	6.08684460434429	5.70801873345797	6.12137787493917	5.51232388703110	5.54705927824263	5.56397339459233	5.42536644465202	6.07518353699704	5.99073740541829	6.00859947086333	6.13175291205324
PP_ICE53196	5479		4.31981040745640	4.34743247211859	4.28633961905462	4.28808173485494	4.47657698785547	4.38592004903074	4.44297882272291	4.45011474508977	4.07003447489547	5.28059156902130	3.99641813160855	5.18533992098558	3.93032585927520	5.21580813203922	4.02657600526106	5.21957816640703	4.12624270910276	5.39682351660276	4.27606931272822	5.38603672860777	3.75378405050147	5.61074682459804	4.01157438070632	5.39631850761496	4.10571645688178	4.92232723705236	4.36240431013837	4.14557074445617	5.30078786060357	6.29291244550421	6.14216462068060	6.02790799009517	4.13971942484964	3.92906915071719	3.78421899254799	4.14883089435646	5.37021384570510	5.09827045370405	5.23425368170013	5.40320257521632
PP_ICE53587	5480		1.90682120650499	1.85188454590937	1.65545002254038	2.17376983594866	5.09218967438402	5.05201145949782	4.95088451465666	4.99216694115989	3.30049498037122	4.78181331529198	3.18563626485222	4.76840253150956	3.38827182224364	4.42391522960074	3.21864288907377	4.71803180064034	3.28507780530028	6.12535887922673	2.90027112551677	6.06267216188603	3.35996532012646	5.94943094352637	3.30254820966255	5.93238492557483	3.54175430773589	3.75568102425396	3.99258679591640	4.01989428096207	8.96798748621807	9.47415480164429	9.36199444192487	9.29732553621989	3.15239206444283	2.99267373925448	3.34216861111256	2.86956240529962	5.21683838800729	5.19302527020501	5.19872942763842	5.16187605637337
PP_ICE55120	5482		0.290545155506002	0.429950622510921	0.264309374595002	0.217913992173659	4.05044430776029	4.47869958191175	4.23495765623960	4.27916130292494	0.596878239936994	1.81553628414310	0.346405772209658	0	1.14131540483097	0	1.08746230562808	0	0.389424331309708	5.55811508960084	0.913820675518263	5.49281637863732	0.726957434632628	5.55603756465895	1.05435721815276	5.64800807172541	2.77917751205439	3.03011849559156	0	1.24879689936465	8.45330966437785	9.05533589948450	9.04624999535982	8.99831939977326	0.603950645500696	0.326788808815092	0	0	2.58198504943459	3.23517311366610	3.30277339168042	2.05458368133399
PP_ICE55476	5483		1.74400157834470	1.05783740007652	0.645842401468742	1.08107300814367	5.14227617768523	5.20750053335660	5.22459128402381	5.16205702288530	3.02502632473232	3.67839412893154	3.25186853427116	3.27246620990602	3.18367601326908	2.96093680658063	3.13668661084932	3.38538667012163	3.11021589049047	5.96539645358994	3.50005877284217	6.16253386525549	3.46556471295602	6.15454552085598	3.19362452420272	6.19357647505743	3.42891319258079	4.27553863581065	3.09655017389375	1.24879689936465	9.08501925570628	9.85833131537550	9.74848691618987	9.64894714225782	3.30041691329030	3.23278044818328	2.84393692623546	2.92255305321341	4.52910100015285	4.81262207865210	4.45563479358891	4.56695144417387
PP_ICE56883	5484		0.853830046196247	0.590988438892605	0.921340169988476	0.796335595409389	4.44273978715100	4.37563366110748	4.50370074323244	4.57073153393495	1.84163736518047	2.42380584359234	1.55303395244706	3.05875622493888	1.71670901629421	2.78891609258976	2.03951782403661	2.49277313025118	1.21806916262796	4.58060380355472	2.04410527468251	4.83684455808870	1.84749106855089	4.57092812081488	1.88864251457503	4.86761733263976	2.86673357728251	3.55201275286046	4.00691814043009	4.25720144657908	7.34272454642526	8.07187592791672	7.97327419158224	7.58414774380484	2.18364952385321	1.40905071570429	1.44377436661912	1.81102409474049	3.23658694489144	3.38368601795468	2.64574694897281	2.89087002495697
PP_ICE57827	5485		0	0	0	0	3.36738232554757	3.51048608003939	3.23214169659305	2.89027062590904	1.23817663362339	1.81553628414310	0.346405772209658	0	1.66046710627364	1.39937751441988	0.945223580700705	0	1.06626922807695	3.01134270945406	1.70137831872810	3.52062308627505	0.726957434632628	2.86971302593585	1.33636711756952	3.60233609719672	1.04456675927389	2.41982009744842	0	0	6.00579111658255	6.85810482874764	6.48637774987098	6.46185039566428	1.12276132592657	1.49930550733815	1.44377436661912	1.35535783019296	0	0	1.45243132834374	1.48201223243838
PP_ICE58432	5486		1.47512049086575	0.959941946045971	1.39260218491774	0.900519287498122	6.43372516888413	6.44465971950145	6.44129191060660	6.53019351961441	2.96371967832458	3.61120416781174	3.05799490994167	4.27741118011572	3.19620985824255	3.34899448211772	3.13668661084932	2.49277313025118	3.38668752830868	5.13581761432270	3.01650610706701	5.55021495574500	3.35996532012646	5.25888769360530	3.19362452420272	5.34526377631350	4.70766493214406	5.41515962477352	5.43557685863705	5.55898484560311	9.57874357095107	9.91425702274053	9.75755263450569	9.78633551166898	3.16996363280304	2.86902729913532	2.87048993681143	2.66940356972829	2.58198504943459	3.73013216984948	3.30277339168042	3.95176114480279
PP_ICE59110	5487		0.853830046196247	0.729654233821981	1.03502855567640	0.680021644349342	4.13417950176961	3.90179737535281	4.18991262424405	4.08482006073160	3.30049498037122	2.79929827914937	3.38656962805734	3.94647500903508	3.27980565948393	3.62785787158967	3.18666179801779	3.70436342331538	3.30274602724947	3.84742717009467	3.18446670009310	4.16760475783358	3.15462779250850	4.30088184720471	3.07136959773312	4.24309142094340	2.60466809880211	3.20435581057000	1.41806230537478	0	7.69150126312142	8.25099666235837	7.92086693920168	7.42348504574289	3.18723176531980	3.03071034657537	3.03890275845210	3.08129636543991	3.45183988868125	3.82325908944595	3.84650032436929	4.23462642981250
PP_ICE59888	5488		1.85543823952201	1.44056702058386	1.76481600966354	1.76978687685290	5.32687792800039	5.40860747060090	5.29948392996193	5.34172915400323	2.45218654450543	2.94471770235295	2.49957839112881	3.84325915796042	2.34533535523563	3.45083685137081	2.57974415926132	3.53468781775228	2.20763941837998	5.40770333645914	2.61721888828374	5.32804258810472	2.25656346567527	5.21467231612533	2.42353761737373	5.40868506012952	3.36732814323024	3.86054563571306	3.09655017389375	1.78713085659874	8.36844471541760	8.95707006730380	8.94324836722981	8.70104039377027	2.22929541489686	1.97187554653419	1.87924422839369	2.26534472687595	3.90988962335847	3.90844743467600	4.24482186481978	4.13087408928466
PP_ICE62755	5490		0.515402630218447	0	0	0.548375909066184	3.52688636083556	3.46011879970915	3.30450066635710	3.44856024173863	0	0	0	0	0	0	0	0	0.389424331309708	1.22798195065763	0	1.96725620047894	0	1.64054685042021	0	3.13372225011032	1.37307412336990	2.26880713886913	0.577892282927808	0	6.07461967864353	6.78797699651302	6.43140423648863	6.23620854267561	0	0	0	0	0	0	2.02114805484218	0
PP_ICE63176	5491		0	0.590988438892605	0.473162514716549	0.548375909066184	4.59731696625202	4.77516456141746	4.59608764823072	4.59963279144617	0.596878239936994	1.27317751251931	1.12163888283010	1.80422507340509	1.03902930227038	1.96084842923864	0.779343915948792	0.949712798851973	0	4.76121578214850	0.557852084755765	5.00142423804874	0	4.98722765130659	0.660140838474325	4.96797359221464	2.51942359877074	3.45731016242876	1.98213509529344	1.24879689936465	8.11987676034972	8.91359068082076	8.71221135227674	8.44289847230510	0	0.326788808815092	0.870095345305450	0.494445319704519	1.96173858365229	3.06069142300119	1.45243132834374	1.48201223243838
PP_ICE64584	5492		0.698865172820649	0	0.264309374595002	0	4.47657698785547	4.39610170359140	4.46070741972149	4.48266124846586	0	0	0	0	0.475503484010339	1.39937751441988	0.331708887421483	0.949712798851973	0.389424331309708	4.22831154427462	0.557852084755765	4.75203035217054	0	4.43271722755182	0	4.54676687217296	2.57705286249157	3.20435581057000	0	0	8.18643791839864	8.93715585785370	8.78401297335531	8.65253521632996	0.346893313807786	0.572682759540808	0.654800746088038	0.277475868136516	3.23658694489144	2.58062471418869	1.45243132834374	2.89087002495697
PP_ICE65513	5493		0.515402630218447	0.590988438892605	0.473162514716549	0.796335595409389	5.05023200295207	5.19845956352883	4.94006277895907	4.88301125910558	0.342326300987688	0	0.603196489866293	2.41148644604578	0.648796057732687	0	0.945223580700705	0	0.668988482054380	3.94547669913568	0	4.16760475783358	0.726957434632628	4.43271722755182	1.05435721815276	4.24309142094340	3.20192238416983	3.45731016242876	3.06054698554397	4.06356509245214	7.02099923805272	7.78387871519269	7.56394302564864	7.48757248845970	0.808258818336300	0.326788808815092	0.380064891057323	0.494445319704519	1.96173858365229	1.62303736425890	2.38144030856816	3.06389384461933
PP_ICE66202	5494		0	0	0.264309374595002	0	3.86723824093057	3.72019533492821	3.57233726676135	3.78880864934268	0	1.27317751251931	0.346405772209658	0	0.796447184513409	0	0	0	0.389424331309708	3.12364122829824	0	3.52062308627505	0	3.59299913167588	0	3.24665405185250	2.16757844592472	2.09086191717927	0	0	6.29463771448354	6.94714299268579	6.76021090673132	6.70185261258040	0	0.572682759540808	0.380064891057323	0	0	1.62303736425890	0	2.05458368133399
PP_ICE66625	5495		0.290545155506002	0.237906685790383	0.473162514716549	0.217913992173659	3.66441404647522	3.60419475849990	3.24703842375083	3.37862109524985	1.84163736518047	1.81553628414310	1.71447135296501	1.80422507340509	1.76995549521946	2.78891609258976	1.32267013656678	2.91423142849958	1.97264947831655	3.54963612320016	1.94237962655033	3.15928595097364	1.14344328233537	2.86971302593585	2.50313763105369	3.44022612769697	2.03232384522051	2.86492491725921	2.60390723309902	3.70815105756734	6.65395793576834	7.41968705761989	7.46402065370443	6.89899196874247	1.36165851134129	1.58208445002910	1.19752126035808	1.26929812260218	2.96191908303381	2.58062471418869	2.02114805484218	2.68151297187584
PP_ICE67001	5496		0.290545155506002	0	0	0.396733920648235	3.85845798612300	3.74962843377008	3.88212164589180	3.73109580974672	0	1.27317751251931	0.807336546752252	0	0.648796057732687	0	0.331708887421483	1.99332093901302	0.887229458537146	3.01134270945406	0	2.42052049584952	0.726957434632628	1.64054685042021	1.05435721815276	2.48320857860047	2.03232384522051	2.72022731757124	3.06054698554397	2.76738002374279	6.26208732629341	6.97765080250688	6.74655921720634	6.76347267089009	0.603950645500696	1.19967912982824	0	0	1.96173858365229	2.58062471418869	1.45243132834374	1.48201223243838
PP_ICE67231	5497		0	0	0	0	3.67506460889573	3.63718892041903	3.35883965619261	3.50332414574005	0	0	0.807336546752252	0	0.796447184513409	1.96084842923864	0.779343915948792	1.42790027893046	0.389424331309708	2.88481892590752	0.913820675518263	2.96800570379782	0	3.17257810103187	0.660140838474325	3.00639377543106	2.39312951074394	2.34716152780996	0	0	6.73619234458276	7.42929678102371	7.14242321044392	7.01500464732877	1.24932700148032	1.30983450102279	0.380064891057323	1.07116079333671	0	1.62303736425890	2.02114805484218	1.48201223243838
PP_ICE67800	5498		3.41222282838236	3.07645900957921	3.17773560907248	3.49334787593588	3.53909762172723	3.88505125308150	3.52867654552860	3.77265631861518	3.46650745442583	4.94091359569815	3.57722151631760	4.20437021886274	3.54053374341316	4.81305436667243	3.50418912870611	4.67462907156652	3.46412526745165	4.52984976933093	3.77446582097336	4.65935042109681	3.67569184949256	4.45711998937762	3.71862727761763	4.68260791216962	3.58355147609375	3.50578211153966	4.08884354032985	4.35761269639378	4.44083316483023	4.40129113182968	5.08069559620084	4.31616881144573	3.59034537194624	3.54461208294917	3.27453270173272	3.60595855974714	4.38765883741039	4.25083321149932	4.09305804876628	4.56695144417387
PP_ICE68241	5499		0	0.959941946045971	0.793048810788050	0.396733920648235	2.47373153023006	2.26486368712397	2.71257399989823	2.56805049005463	2.16975914231985	3.95974029378966	1.91628528026621	3.44844891678483	2.04083897283641	3.23559179493522	2.03951782403661	3.84938235723500	2.15386378310084	3.79454450008152	1.94237962655033	3.78548878734963	2.00318932302950	4.35571864060910	1.88864251457503	4.07147013073237	1.04456675927389	1.74535324237258	1.59155692771367	1.78713085659874	5.63995155938310	5.89578604184916	6.09933388134435	5.61471128704382	2.18364952385321	2.12150243995757	2.07137058717307	1.91047493728721	4.38765883741039	4.25083321149932	3.84650032436929	4.01509764246824
PP_ICE68987	5500		0.853830046196247	0	0.645842401468742	0.548375909066184	4.95180836166388	4.95839092918389	4.86084258916217	4.88836138555723	0.596878239936994	0	1.24814015981023	1.80422507340509	1.14131540483097	3.45083685137081	0.779343915948792	1.42790027893046	0.389424331309708	5.23059290199457	0	5.22322121165618	0.726957434632628	5.05576544870668	0	5.45667643273299	2.75603593484381	3.20435581057000	2.48088951194844	2.13516461119860	8.16693058994952	8.91953424026399	8.73128065875768	8.70839214893496	0.346893313807786	0.572682759540808	0.380064891057323	0.955115731482244	3.23658694489144	2.84919361777705	3.02727710919988	3.55586056110455
PP_ICE71178	5501		0	0	0.264309374595002	0.217913992173659	3.80409315217076	3.73991334010528	3.51745687103769	3.70530430810199	0.342326300987688	2.42380584359234	0.603196489866293	0	0.265752368650841	0	0.331708887421483	0	0	2.88481892590752	0	2.85662782704687	0.726957434632628	2.98117443324558	0	2.22297141208535	1.54422371323076	2.18378737967482	0	0	6.84657005694810	7.76866925216961	7.58990520874640	7.06675081528356	0.808258818336300	0	0	0	0	1.62303736425890	0	0
PP_ICE71723	5502		0	0	0.645842401468742	0	4.68208177466012	4.92313809601674	4.59224341295521	4.72340249304539	0.342326300987688	0	0.603196489866293	0	0	1.39937751441988	0.580367173510088	0.949712798851973	0.389424331309708	4.52984976933093	0	3.95620392156197	0	3.70132417641264	0	4.42301625444146	2.86673357728251	3.50578211153966	0.941785310791375	0	7.43046148934524	8.32395899621403	7.98662095513104	7.79661181867861	0.346893313807786	0.326788808815092	0.380064891057323	0.494445319704519	2.58198504943459	2.21232372594792	2.85459838561121	0
PP_ICE72295	5503		0.853830046196247	1.05783740007652	0.645842401468742	0.548375909066184	4.65461750610355	4.58058753306321	4.74218692993152	4.64147642335139	0.968077887875098	2.16522416375413	0.603196489866293	0	0.475503484010339	0	0	0	0.887229458537146	4.69724744521239	0	4.91502434291953	0	4.80058640148935	0.660140838474325	5.23459924171501	2.63154118265696	3.37989021371203	1.20801476293022	0	7.94856608644999	8.73227101003072	8.62159133599414	8.42846671070330	0.603950645500696	0.326788808815092	0	0.277475868136516	1.96173858365229	3.23517311366610	2.02114805484218	2.41639425438408
PP_ICE73029	5504		0.290545155506002	0	0.921340169988476	0.396733920648235	4.52301217088255	4.76119948381730	4.59224341295521	4.84194602717297	0	1.27317751251931	0	0	0.265752368650841	0	0.331708887421483	0	0	4.36001915201773	0	4.76957844153247	0	4.08112171538865	0.660140838474325	4.68260791216962	3.07418615547468	3.57435053870377	2.60390723309902	1.24879689936465	7.73288580799412	8.57271875241929	8.53120532837565	8.16689451947859	0	0	0	0	1.96173858365229	2.21232372594792	2.02114805484218	2.68151297187584
PP_ICE73676	5505		0.515402630218447	0.729654233821981	0.264309374595002	0	4.73116811400133	4.73628125915946	4.71870616742359	4.55223467214461	0.596878239936994	0	0.807336546752252	1.80422507340509	0.475503484010339	0	0	1.42790027893046	0	3.79454450008152	0	3.24275305059633	0	3.25609208193421	0	3.92015747007615	2.68321331449740	3.55201275286046	0	0	6.83730632473302	7.59220477898272	7.50132560487414	7.23464312798065	0.603950645500696	0	0.380064891057323	0.277475868136516	0	2.58062471418869	0	2.68151297187584
PP_ICE74436	5506		1.30758929455686	1.66722613071419	1.03502855567640	1.23395903170737	6.37282324135629	6.31739903631950	6.34462475380636	6.40429476595844	1.45061984589468	0	1.12163888283010	1.80422507340509	1.03902930227038	1.96084842923864	1.21196567946595	1.42790027893046	1.06626922807695	6.24465761008510	0.913820675518263	6.42008045029261	1.14344328233537	6.51718855057592	1.33636711756952	6.40048219398086	4.03007280430273	4.79392174605145	3.69172282226418	3.97422889350512	10.9767685214999	11.6253741118762	11.4714413434821	11.2336268692614	0.808258818336300	0.572682759540808	0.380064891057323	0.277475868136516	3.45183988868125	3.06069142300119	1.45243132834374	2.41639425438408
PP_ICE75419	5507		3.88929030729012	3.51153015453793	4.05830015684486	3.77526400853749	8.78316551382948	8.70032831435879	8.74153004584361	8.74789356904424	3.78107276412143	3.85649621087871	3.78540548938207	3.44844891678483	3.66488130507599	4.07755189343069	3.92319522790259	3.91469905285849	3.95020460592133	8.69961736560300	4.01683130754941	8.79622622044518	3.67569184949256	8.89482291686286	3.84627153547895	8.73302960598652	6.34926440916277	7.04878738783809	6.07572355056370	6.32862031069768	13.3972254096627	14.0492043389999	13.8951609377197	13.8315484921888	4.02062418627595	3.83344526245580	3.64942990325243	3.80958287049717	5.34136315641340	5.17016493376299	5.10397145314765	5.30681048913122
PP_ICE77798	5508		1.90682120650499	1.97096348045555	1.95311585124561	1.76978687685290	8.08863303194408	8.10032331772360	8.04104205949394	8.08208279519825	2.12201660692297	3.74135243266918	2.03125132606501	3.84325915796042	2.37408534113239	3.62785787158967	2.48604938996290	3.57988114184571	2.59371624511398	8.43230175020643	3.27318036254136	8.49642271709914	2.83507334929529	8.58916445086936	3.30254820966255	8.51103170791798	5.88569871301235	6.35650829180966	5.88628615528499	6.30618801070775	12.8795465683042	13.4953784768676	13.3362909909711	13.2894638566886	1.71583615764948	2.50215292480635	1.87924422839369	2.29799854590940	4.99505003101651	5.04729854452437	5.04248358592157	4.63525143669450
PP_ICE78972	5509		1.95569249609433	1.76381163747942	1.71162738646516	1.63689001908513	8.08116299888742	8.13355779425389	7.97774842352645	8.05546726444054	2.80410856092447	3.67839412893154	2.49957839112881	4.34547838699588	2.64544518600195	3.70585440679003	2.18233013395389	3.84938235723500	2.94932019948684	8.47601243598044	3.27318036254136	8.63535673898130	3.15462779250850	8.74273562562707	3.11380377765361	8.58295287206883	5.75344107305709	6.21734835198412	4.58499261615121	4.76940307216620	12.8201404542178	13.4603151416546	13.2999784474492	13.2846940565254	2.65811075086496	2.70232119516734	2.56662998475135	2.75433159583224	5.11208040768379	5.09827045370405	5.25155350981774	5.25489029253009
PP_ICE79699	5510		1.61857107176166	1.14699807839803	1.03502855567640	1.48358475989855	7.29733219814705	7.38644168362155	7.34429294749314	7.42671483512850	1.54201042959543	2.62907380654907	0.976785465455175	2.78660165747877	0.925076038577410	2.31826446138327	1.08746230562808	2.35230842952563	2.09703115890318	7.95419591136302	2.22094963649019	7.94819916259878	2.45854268303654	8.15931468981540	2.13777162415169	8.03294105823986	5.35711598525966	5.57963843523659	5.55135815419505	5.01175982770587	12.1773231973194	12.8220178427413	12.6990588363466	12.4219519290195	1.46263630697592	1.49930550733815	0.654800746088038	1.70057937434109	3.45183988868125	4.45942387954863	3.97735885569553	4.28272658357790
PP_ICE79976	5511		2.04680534631300	1.56030467009345	1.86339150183524	1.58835355616365	7.77431172519454	7.54395374029919	7.69991342560471	7.69547093574910	0.968077887875098	1.27317751251931	1.24814015981023	2.41148644604578	0.925076038577410	2.31826446138327	0	1.75005191630878	2.51988270100944	8.04259019715523	2.13643161316468	7.98027632031466	1.84749106855089	8.22935842328262	2.42353761737373	8.04533757117483	5.06229512165758	6.17069878226739	5.33523434117017	5.57796034575266	12.3439895929912	13.0169927114903	12.8689447419758	12.6394930392715	1.36165851134129	0.326788808815092	1.19752126035808	1.17512875187383	4.95278478119478	4.63192450715066	4.49294491994791	4.45486873248527
PP_ICE80480	5512		2.31285405439312	2.28884074284952	2.11151495828445	1.36654088144983	7.77816975964889	7.86240153379790	7.76005550196892	7.75624882647495	0.799603725514220	1.81553628414310	1.24814015981023	0	0.475503484010339	1.96084842923864	0.331708887421483	0	2.25867021266157	8.21144401787832	2.37116958521898	8.33403832516523	2.45854268303654	8.38939454076100	2.02094525310666	8.30505203882062	5.71654153301830	6.14568785217710	6.45306598362137	6.98929818180313	12.3413413980987	12.9098028245997	12.7803080257539	12.6053441755929	0.603950645500696	0.572682759540808	1.04714983149073	0.494445319704519	4.38765883741039	4.50541789202627	4.69157942586974	4.41453086431300
PP_ICE80908	5514		1.68325163872762	1.50222691386327	1.65545002254038	1.36654088144983	7.56605285181989	7.52440528090052	7.52437469039654	7.56359101995094	0.968077887875098	2.62907380654907	0.807336546752252	3.05875622493888	0.265752368650841	3.10766423129923	0	1.42790027893046	2.30722281734549	8.37329921623250	2.04410527468251	8.49976652002697	1.66299887576207	8.52896247937860	1.88864251457503	8.45887646246630	5.24511642236773	5.94022899975997	4.62412787958014	4.72629501996810	12.1456274557066	12.7774638484888	12.5858553217282	12.2512063193734	0.603950645500696	1.19967912982824	0	0.672629530282166	4.76321553677216	4.81262207865210	5.04248358592157	4.99231619236175
PP_ICE81655	5515		2.91950570547871	2.59190411855404	2.74222570808429	2.87920564074764	9.20228191689544	9.05126360780825	9.14192631392263	9.20089399230772	0.596878239936994	3.61120416781174	0	3.72815050100481	1.03902930227038	2.96093680658063	0.580367173510088	2.18883792254591	3.37045347492999	9.87029495421488	3.24447479375768	9.88768036082625	3.64824447854981	9.97231562588966	2.88094789480576	9.90993799515017	6.82863157503099	7.60371847714980	6.64331093736450	6.81173256422601	14.0062671240007	14.5980295317464	14.4100278075221	14.3843538866460	1.12276132592657	1.19967912982824	1.44377436661912	1.17512875187383	6.31182782067928	6.75628732538431	6.40786308193520	6.45162887056536
PP_ICE83350	5516		0	0.237906685790383	0.793048810788050	0.396733920648235	4.38192851468750	4.45031995037541	4.47380060614113	4.58166762315491	0.596878239936994	2.16522416375413	0.976785465455175	3.27246620990602	0.925076038577410	1.96084842923864	0.779343915948792	1.42790027893046	0	4.41989183573368	0	4.67858632471332	0	5.00131616113860	1.05435721815276	4.73216677487758	2.54865331470101	2.99130739092951	0.577892282927808	1.24879689936465	8.29898903859423	9.04350843084024	8.96291858835655	8.70594756433262	0.346893313807786	0.934537055200911	0.654800746088038	1.17512875187383	2.58198504943459	2.58062471418869	2.64574694897281	2.05458368133399
PP_ICE84338	5517		2.13030544036513	1.80881738312854	1.13710123672362	1.58835355616365	7.31333976222238	7.51661176141520	7.29673837381332	7.27840690651750	1.23817663362339	2.42380584359234	1.36042095314306	3.05875622493888	1.95843708796820	2.96093680658063	1.67275422216991	2.18883792254591	2.25867021266157	8.69315899636544	1.94237962655033	8.92062308467324	1.66299887576207	8.88767181777918	2.57686599516795	8.88462596404678	5.46096172211599	5.79785173401562	4.71223993512747	4.92535364700162	12.2051119954392	12.7223954328891	12.6258558150262	12.4909346065223	1.24932700148032	0.934537055200911	1.54735735015096	1.64041813226173	5.47795007169442	5.69708578822628	5.54647499386496	5.51878123957597
PP_ICE84835	5518		2.43815073634716	2.11044976185787	1.71162738646516	1.95826252196576	8.05084528911687	8.13957072804721	8.13112318408756	8.19692104917721	2.34075272290313	3.07165025653612	1.46135777270117	3.27246620990602	1.53750015143138	3.90887451777031	2.13695499978307	2.82433115937595	2.75747853594732	9.34424724021774	2.76872657330216	9.54113779614851	3.00756100825422	9.51366728144819	2.33704917165422	9.54406690081668	6.10869600923814	6.70414346359740	6.30878459943834	5.81898364258964	12.7150322775667	13.3918532794277	13.2176891835878	13.0234436180912	1.12276132592657	1.65853182217021	1.64121083168043	1.81102409474049	5.85611949011717	6.23354312518590	5.89813588370778	6.18219807715116
PP_ICE85934	5519		1.47512049086575	1.37485389465445	2.07420477775210	1.88707610688335	6.83708594519874	6.91022135307924	6.84318822705668	6.99647919692725	1.62574369965338	2.62907380654907	1.71447135296501	0	1.46983833050122	2.78891609258976	1.59604293612582	1.75005191630878	2.44016006423788	5.62124790124478	2.72073004130301	5.74509111411260	2.54604431464085	5.95483691725417	1.55609185724113	5.61855499980619	5.08990121832603	5.87157214026629	5.81422806958703	5.89709164676095	10.8957836321205	11.5538384860241	11.4293080151990	11.3920240915577	1.46263630697592	1.79585310587762	1.80601969036266	1.70057937434109	3.45183988868125	1.62303736425890	2.02114805484218	2.68151297187584
PP_ICE86310	5520		2.13030544036513	1.85188454590937	1.95311585124561	2.02471645462563	7.36597788596093	7.41530238716831	7.42112420081756	7.44115227459747	1.62574369965338	2.94471770235295	1.63700687547189	2.41148644604578	2.04083897283641	2.31826446138327	1.74399782996161	2.91423142849958	2.69515358422754	6.42038638438376	2.29887771674433	6.72309762185546	2.13787982695629	6.90875123110500	2.57686599516795	6.68774899114945	5.68450781539853	6.34688978177332	5.23625271952441	4.97808787635931	11.2584481145649	11.9650575443451	11.8047291603784	11.6803078002269	1.55434628257174	1.65853182217021	1.32820881209736	1.75732571474463	3.23658694489144	3.51296812184887	3.41646127389174	3.73341129066585
PP_ICE87127	5521		0.853830046196247	1.37485389465445	1.46506906769586	0.900519287498122	7.02690064112235	7.11921001116887	6.98124017163669	7.10943199744802	2.07187994255061	2.94471770235295	2.03125132606501	2.78660165747877	1.53750015143138	2.96093680658063	1.67275422216991	2.61591569982476	1.90413076835397	6.15654413719910	2.04410527468251	6.25332241729531	2.00318932302950	6.42723482026080	2.64552975641765	6.29479964087340	5.13210961805764	5.75884799217544	5.64962406640439	5.85524518745985	10.8441499561344	11.4691170434553	11.3162688961072	11.2259268917315	1.71583615764948	2.16678513565340	2.12800212084167	2.26534472687595	2.96191908303381	3.06069142300119	3.84650032436929	3.64857129350040
PP_ICE87986	5522		2.08942667347998	1.56030467009345	1.71162738646516	1.48358475989855	7.43293536879065	7.35855763715975	7.46953905218602	7.50082545931492	0.799603725514220	1.27317751251931	0.346405772209658	0	0.648796057732687	2.96093680658063	0.331708887421483	2.35230842952563	1.21806916262796	7.37580302325599	0.913820675518263	7.35852020168785	1.14344328233537	7.57187575390685	0.660140838474325	7.54696777201865	5.55360473046530	6.42520309306649	4.88007407324896	2.39284481291281	11.7273835521730	12.3981714812357	12.2690120211073	12.0702728274772	0.346893313807786	0.572682759540808	0.380064891057323	0.494445319704519	4.02544320750181	4.70816410262213	4.29068992763393	4.72967907564021
PP_ICE88400	5523		1.74400157834470	1.71668452613394	1.90925964652962	1.95826252196576	7.56084608032507	7.53871976292683	7.51778573566016	7.61167354940739	0.799603725514220	1.27317751251931	0.976785465455175	1.80422507340509	0.475503484010339	1.39937751441988	0.945223580700705	1.99332093901302	1.57049878914559	7.78759097707292	1.82912167398451	7.75984530153852	1.43659051044186	7.82485792834891	1.05435721815276	7.81808574321367	5.60776852561216	6.46524502296430	4.81247177188195	3.25275392575459	11.5668130213478	12.1968551908302	12.0750897699537	12.0059674490966	0	0.769888699257125	1.04714983149073	0.277475868136516	4.12901657629318	4.19109896528931	4.97696581828364	4.53096852542064
PP_ICE89247	5524		1.21196887006860	0.590988438892605	1.46506906769586	0.900519287498122	6.85970439420564	6.89076656102288	6.89841536094645	6.92042055653750	0.799603725514220	1.27317751251931	0.346405772209658	2.78660165747877	0.265752368650841	1.96084842923864	0.331708887421483	0.949712798851973	1.75116450964192	6.08770265179249	0.557852084755765	6.31452985992523	2.00318932302950	6.47322280378533	0.660140838474325	6.24812623761367	4.67039953926934	5.36851758752703	5.32004100137983	5.27258617772981	10.1981969747957	10.6817489208409	10.5252118330797	10.2574339333071	0.603950645500696	1.07587001219226	0.380064891057323	0.672629530282166	3.23658694489144	3.06069142300119	3.30277339168042	2.41639425438408
PP_ICE89746	5525		0.515402630218447	0.590988438892605	1.03502855567640	1.36654088144983	4.68208177466012	4.80924714079412	4.69117802862940	4.66510032665625	4.64707566393778	3.74135243266918	4.13145544308466	3.94647500903508	4.70581449525404	4.07755189343069	4.47653790743673	4.25899074923429	4.78776417851827	5.31715831688058	4.84598739014776	5.16637980280004	5.14751925257293	5.25888769360530	4.74560938861118	5.02368350146385	2.32344936949303	2.72022731757124	1.20801476293022	0	8.62454211862753	9.28576635010424	9.06220470296479	9.15290909672302	3.95131856996391	3.70893667324770	4.21335122472961	3.85121883266624	3.45183988868125	4.05972661864310	4.14624656185631	3.88414024753582
PP_ICE91884	5526		1.21196887006860	1.05783740007652	0.793048810788050	0.796335595409389	5.96642742665620	5.92352206035188	5.97381779772351	5.94460456865748	1.45061984589468	0	1.12163888283010	2.41148644604578	1.23410310626287	1.39937751441988	1.08746230562808	1.42790027893046	1.66490612542366	6.34276925056769	1.17580438920728	6.62741441996486	1.14344328233537	6.60535626388792	1.33636711756952	6.56411897301607	3.67165882200669	4.41824634335971	2.94403850025606	2.91251498484673	10.0066678203265	10.8903372214280	10.7113609188264	10.5728909600220	1.97685313575498	1.30983450102279	1.44377436661912	0.955115731482244	4.12901657629318	4.30719951427238	3.69590238260109	4.53096852542064
PP_ICE94175	5527		1.47512049086575	0	1.22971330633599	1.58835355616365	6.62447178254717	6.67568194125048	6.57553305286677	6.65165332808430	1.90435517236528	2.16522416375413	2.03125132606501	0	1.71670901629421	1.96084842923864	1.51295443837581	0.949712798851973	1.83056962642392	5.47060779704559	1.94237962655033	5.48434086984592	1.66299887576207	5.35175606279359	2.02094525310666	5.35827389891412	4.59142461159046	4.78737589443647	4.52749528433785	3.25275392575459	7.19365931991287	7.42209815983948	7.39219004376497	6.89525742490869	1.97685313575498	2.21010583270468	2.23246630261722	2.00092381763501	3.23658694489144	1.62303736425890	2.02114805484218	3.73341129066585
PP_ICEinrR	5542		0.515402630218447	0.237906685790383	0.645842401468742	0.396733920648235	5.81395249304662	5.78580876054881	5.75396547775581	5.79474713021789	1.54201042959543	3.37738399099817	1.91628528026621	0	1.76995549521946	2.78891609258976	1.67275422216991	2.61591569982476	1.75116450964192	3.99111714652473	2.04410527468251	4.41900582417992	1.14344328233537	4.48094141447979	1.73612769547303	4.48680461999107	3.63345496144553	4.30787982390861	2.17733693544206	1.78713085659874	5.56532656062852	5.45793603169147	5.74611546694325	5.57348002501152	1.78774969149574	1.58208445002910	1.32820881209736	1.17512875187383	2.96191908303381	2.58062471418869	0	0
PP_ICE95213	5528		1.10622903570489	1.22885582447806	1.13710123672362	0.796335595409389	6.12005872256349	6.20860754975833	6.20205076607422	6.15470700703278	1.11221884164761	2.16522416375413	1.63700687547189	1.80422507340509	1.23410310626287	2.31826446138327	1.08746230562808	1.99332093901302	1.06626922807695	4.60504641645332	1.82912167398451	4.55719528706874	0.726957434632628	4.85061266889566	1.33636711756952	4.86761733263976	4.13562045278291	4.70528923983998	2.90197718107048	2.59754545755246	6.72236783880200	7.20510562016281	6.98583137656835	6.77619707364244	0.977823428061847	1.19967912982824	1.32820881209736	1.43459457114883	1.96173858365229	2.21232372594792	3.02727710919988	2.41639425438408
PP_ICE96323	5529		1.61857107176166	1.05783740007652	1.22971330633599	1.68317934135523	3.19479137759916	2.88192957089437	3.12114571490366	3.14888720969077	1.77472125853363	2.42380584359234	1.24814015981023	2.41148644604578	1.60087254821213	1.96084842923864	1.67275422216991	0.949712798851973	1.57049878914559	2.57044663819083	0.913820675518263	2.42052049584952	1.66299887576207	3.17257810103187	2.02094525310666	2.22297141208535	1.98284356551375	2.77082221299294	1.20801476293022	0	5.14506380936308	5.65939216430707	5.45949788387432	5.47009846855049	1.78774969149574	2.02427848963730	2.49296637947718	2.69132128959648	1.96173858365229	2.21232372594792	1.45243132834374	1.48201223243838
PP_ICE97571	5530		0.987971649241549	0.590988438892605	0.473162514716549	0.217913992173659	3.65364882732063	3.62631137658861	3.77469581451527	3.42578639550379	0.342326300987688	0	0.346405772209658	0	0.475503484010339	0	0.779343915948792	0	0.668988482054380	2.73993598499540	0	3.52062308627505	0.726957434632628	2.60075954016460	0	2.48320857860047	2.24854780638936	2.55099172122124	2.26228975625777	0	6.34155897978570	6.68777322351281	6.76472036642037	6.49589225134969	2.13582001502783	2.32983122974401	2.37117500077939	2.08386598097399	1.96173858365229	0	1.45243132834374	2.05458368133399
PP_ICEparB	5546		1.61857107176166	0.429950622510921	0.921340169988476	0.796335595409389	4.21761859901475	4.20710598556875	4.23495765623960	4.23400097533520	1.77472125853363	3.46154659409975	1.78636411047804	1.80422507340509	1.95843708796820	2.96093680658063	2.13695499978307	2.82433115937595	1.90413076835397	3.94547669913568	1.70137831872810	3.83097655377657	1.84749106855089	3.59299913167588	1.55609185724113	3.52456247703547	2.68321331449740	3.03011849559156	1.59155692771367	1.78713085659874	5.96951474376183	6.59308933938629	6.62490652284357	6.27173104969000	3.55542220002801	3.48718262771426	3.18299883717773	3.40456764724654	4.22286216566411	4.12756857906457	3.30277339168042	3.21134995476312
PP_ICEshi	5547		0	0.237906685790383	0	0	2.28002303755221	2.58988979185201	2.48709414349643	2.28779816345655	0	0	0	0	0	0	0	0	0	0	0	0	0	0	0	0	0	0.581090635686749	0	0	3.85565671390020	4.35064297132312	4.14937724481658	4.09635743617056	1.63834755646991	0.326788808815092	0.870095345305450	0.672629530282166	0	0	0	0
PP_ICEparA	5545		0.698865172820649	0.959941946045971	0.473162514716549	0.994865580487409	4.39748152091093	4.34944502616850	4.45630464923264	4.44180987143836	1.77472125853363	1.81553628414310	1.55303395244706	2.78660165747877	1.23410310626287	2.58102754597875	0.945223580700705	2.61591569982476	0.887229458537146	3.67956916278748	1.17580438920728	3.78548878734963	1.43659051044186	3.88807611336539	1.73612769547303	3.24665405185250	2.96638940892341	3.52916456743675	0.577892282927808	0	6.07461967864353	6.81926470612047	6.88736261068102	6.35858500129933	3.23731602364667	3.03071034657537	2.69943885978204	3.15212040027917	1.96173858365229	2.58062471418869	2.38144030856816	2.89087002495697
PP_ICEalpA	5531		0	0.429950622510921	0.264309374595002	1.16043494580282	3.30801123189471	3.07024453451439	3.13777670959832	3.41420197944351	0.342326300987688	0	0.807336546752252	0	0.475503484010339	0	0.331708887421483	0	0	2.88481892590752	0.557852084755765	2.42052049584952	0	2.43317233487660	0.660140838474325	2.68951620586602	2.03232384522051	2.72022731757124	3.06054698554397	3.42861003091476	5.14506380936308	5.70063610153081	5.21647733743030	4.97747263689909	3.42932917996903	3.68011270788898	3.23891813051473	3.57059638756833	0	2.58062471418869	3.02727710919988	2.41639425438408
PP_ICE101284	5442		3.24307684598108	3.20420843298833	3.48938424840027	3.35036899258497	2.60553279794678	2.34676451894248	2.99627339059099	2.64637077330706	3.26993476635109	3.67839412893154	3.25186853427116	3.59804711912085	3.30246052782397	2.78891609258976	3.33722597548744	3.94582422711610	4.08705282193387	4.41989183573368	3.90297329156334	4.13533111231452	4.01652009870525	4.50420855747721	3.92312983322119	4.24309142094340	5.79352824423301	7.18784072627003	7.09157290346566	7.40509599086135	5.00026579269560	5.40505867084731	5.44276289333057	4.64881920106573	6.42046827926951	6.21920091593360	6.26139853839844	6.23149177552387	4.02544320750181	3.90844743467600	4.33454605749639	4.60168443825218

## Sheet: Fig6b_fold_changes
ICE					∆mfsR/WT				∆mfsR∆bisR/WT					Pvalue (F-I/J-M)	FDR
PP_ICEint					2.70093	3.25376	3.17242	2.98251	-1.45198	-1.50567	-1.28305	-1.29522		0.000692291	0.0049435
PP_ICEtciR					3.15429	3.3905	2.94136	2.87679	3.65878	3.63108	3.41277	3.43403		0.0144211	0.0209761
PP_ICEmfsR					0.708533	1.0673	0.736646	0.564382	1.01233	1.34818	1.10136	1.00253		0.0501011	0.0616629
PP_ICE50240					2.24195	3.34467	3.38187	3.06346	-0.677101	0.0735477	0.309305	-0.279148		0.00386819	0.00884159
PP_ICE52324					0.731003	1.84021	1.23927	0.429821	0.877233	0.427488	0.831252	0.0483834		0.206532	0.236037
PP_ICE52710					0.347038	0.966267	0.577791	1.03299	0.824229	0.87016	0.878371	1.04336		0.319315	0.340603
PP_ICE53196					0.824211	1.90699	1.69919	1.57779	0.893637	0.71235	0.791275	0.953088		0.0441337	0.0588449
PP_ICE58432					3.14502	3.4696	3.31626	3.25614	-3.85174	-2.71453	-3.13852	-2.57843		0.00197138	0.00630843
PP_ICE67231					3.06113	3.79211	3.78358	3.51168	-3.67506	-2.01415	-1.33769	-2.02131		0.00326798	0.00871461
PP_ICE67800					0.901736	0.51624	1.55202	0.543512	0.848561	0.365782	0.564382	0.794295		0.366511	0.366511
PP_ICE81655					4.80399	5.54677	5.2681	5.18346	-2.89045	-2.29498	-2.73406	-2.74927		4.52889e-05	0.000724623
PP_ICE88400					4.00597	4.65814	4.5573	4.39429	-3.43183	-3.34762	-2.54082	-3.08071		0.000926905	0.0049435
PP_ICE89746					3.94246	4.47652	4.37103	4.48781	-1.23024	-0.749521	-0.544931	-0.78096		0.00157126	0.00628503
PP_ICEinrR					-0.248626	-0.327873	-0.00785001	-0.221267	-2.85203	-3.20518	-5.75397	-5.79475		0.00574478	0.0114896
PP_ICEalpA					1.83705	2.63039	2.0787	1.56327	-3.30801	-0.48962	-0.1105	-0.997808		0.00753604	0.0133974
PP_ICE101284					2.39473	3.05829	2.44649	2.00245	1.41991	1.56168	1.33827	1.95531		0.0110229	0.0176366

## Sheet: Fig6c
Strain			mean_95th_REP1	mean_95th_REP2	mean_95th_REP3		TTEST_qq95
s6059-FL1	UWC1 Tn5 Pint-echerry / Pinr-eGFP	pMEparB97	1058	1014	923		9.85586e-06	H1= with bisDC>pME
s5719-FL1	UWC1 Tn5 Pint-echerry/Pinr-eGFP	pME6032	55.6	69	52
s7183	UWC1 miniTn5 P50240-gfp R2	pMEbisCD	267.203	186.147	270.095		0.027808
s7205	UWC1 miniTn5 P50240-gfp R2	pME6032	145	183	95
s6301	UWC1 Tn5 Porf67231-gfp	pMEparB97	613	229	407		0.02777
s6298	UWC1 Tn5 Porf67231-gfp	PME6032	59	183	53.7
s6059-FL2	UWC1 Tn5 Pint-echerry / Pinr-eGFP	pMEparB97	129	83	100		0.0041
s5719-FL2	UWC1 Tn5 Pint-echerry/Pinr-eGFP	pME6032	42.6	30	36
s6793	UWC1 Tn5 Porf81655-Fr4-gfp	pMEBisDC	511	507	501		9.2e-09
s6230	UWC1 Tn5 P81655-gfp	pME6032	41	42	47
s6313	UWC1 Tn5 Porf88400-gfp	pMEparB97	127	167	69		0.0995
s6310	UWC1 Tn5 Porf88400-gfp	PME6032	69	57	95
s6307	UWC1 Tn5 Porf89746-gfp	pMEparB97	101	102	139		0.1877
s6304	UWC1 Tn5 Porf89746-gfp	PME6032	39	146	46
s6065	UWC1miniTn7 PalpA-gfp	pMEparB97	121	154	164		0.01023
s5503	UWC1miniTn7 PalpA-gfp	pME6032	97	40.3	21.2
s5698	UWC1 miniTn5 bisR-gfp	pME6032	76.7	49.4	35.8		0.5464
s6072	UWC1 miniTn5 PbisR-gfp	pMEparB97	47	57.6	71.2

## Sheet: Fig6d
P.knackmussii	mean(PbisR-gfp)	PbisR-gfp REP1	PbisR-gfp REP2	PbisR-gfp REP3	mean(PalpA-gfp)	PalpA-gfp REP1	PalpA-gfp REP2	PalpA-gfp REP3	mean(PinrR-gfp)	PinrR-gfp REP1	PinrR-gfp REP2	PinrR-gfp REP3	mean(P88400-gfp)	P88400-gfp REP1	P88400-gfp REP2	P88400-gfp REP3	mean(P81655-gfp)	P81655-gfp REP1	P81655-gfp REP2	P81655-gfp REP3	meanP67231-gfp)	P67231-gfp REP1	P67231-gfp REP2	P67231-gfp REP3	mean(PtraI-gfp)	PtraI-gfp REP1	PtraI-gfp REP2	PtraI-gfp REP3	meanPint-gfp)	Pint-gfp REP1	Pint-gfp REP2	Pint-gfp REP3
inrR++	9.41	8.41	9.41	10.41	2.3	2.5	2.45	1.9	9.3	8.8	9.6	9.5	2.3	2.3	2.5	2.1	1.47	2.18	1	1.23	7.03	8.4	3.7	9	2.43	1.8	2.48	3	5.78	4.67	5.94	6.74
inrR-+	7.9	7.3	7.1	9.3	1.89	2.1	1.7	1.87	8.87	9.9	10.2	6.5	1.57	1.31	1.05	2.34	1.81	2.22	1.46	1.76	0.96	1.1	1.57	0.2					1.83	1.49	1.28	2.73
inrR--	9.07	12.9	5.8	8.5	0.19	0.12	0.3	0.15	1.3	1.3	1.8	0.8	0.2	0.39	0.1	0.12	0.05	0.16	0	0	0.17	0.22	0.1	0.18	0.66	0.83	0.52	0.62	0.53	0.24	0.8	0.54
ANOVA
		diff	lwr	upr	p_adj
	PbisR
(A)inrR++	C-B	1.15667	-2.93367	5.247	0.678367
(B)inrR-+	A-B	1.59333	-2.497	5.68367	0.497878
(C)inrR--	A-C	0.436667	-3.65367	4.527	0.943121
	PalpA
	B-C	1.7	1.10434	2.29566	0.0003017
	A-C	2.11	1.51434	2.70566	8.87e-05
	A-B	0.41	-0.185663	1.00566	0.167449
	PinR
	B-C	7.56667	4.4432	10.6901	0.0007463
	A-C	8	4.87654	11.1235	0.0005501
	A-B	0.433333	-2.69013	3.5568	0.906444
	P88400
	B-C	1.37	0.313568	2.42643	0.0171341
	A-C	2.10333	1.0469	3.15977	0.0021281
	A-B	0.733333	-0.323099	1.78977	0.16367
	P81655
	A-C	1.41	0.341883	2.47812	0.0158273
	B-C	1.75333	0.685216	2.82145	0.0056699
	B-A	0.343333	-0.724784	1.41145	0.611188
	P67231
	B-C	0.79	-3.52786	5.10786	0.844708
	A-C	6.86667	2.54881	11.1845	0.0066211
	A-B	6.07667	1.75881	10.3945	0.0118262
	PtraI
	A-B	1.77	0.772577	2.76742	0.0078907
	Pint
	B-C	1.30667	-0.630301	3.24363	0.176636
	A-C	5.25333	3.31637	7.1903	0.0004009
	A-B	3.94667	2.0097	5.88363	0.0018854
